# Supplementary material for: The impact of 22q11.2 copy-number variants on human traits in the general population
Source: PubMed Central journal article supplement (PMC9943723; doi:10.1016/j.ajhg.2023.01.005), 2023-01-26
Supplement: mmc1.pdf [file mmc1.pdf]

**The American Journal of Human Genetics, Volume 110**

**Supplemental information**

**The impact of 22q11.2 copy-number variants  
on human traits in the general population**

**Malú Zamariolli, Chiara Auwerx, Marie C. Sadler, Adriaan van der Graaf, Kaido Lepik, Tabea Schoeler, Mariana Moysés-Oliveira, Anelisa G. Dantas, Maria Isabel Melaragno, and Zoltán Kutalik**

## **Supplemental Figures and legends**

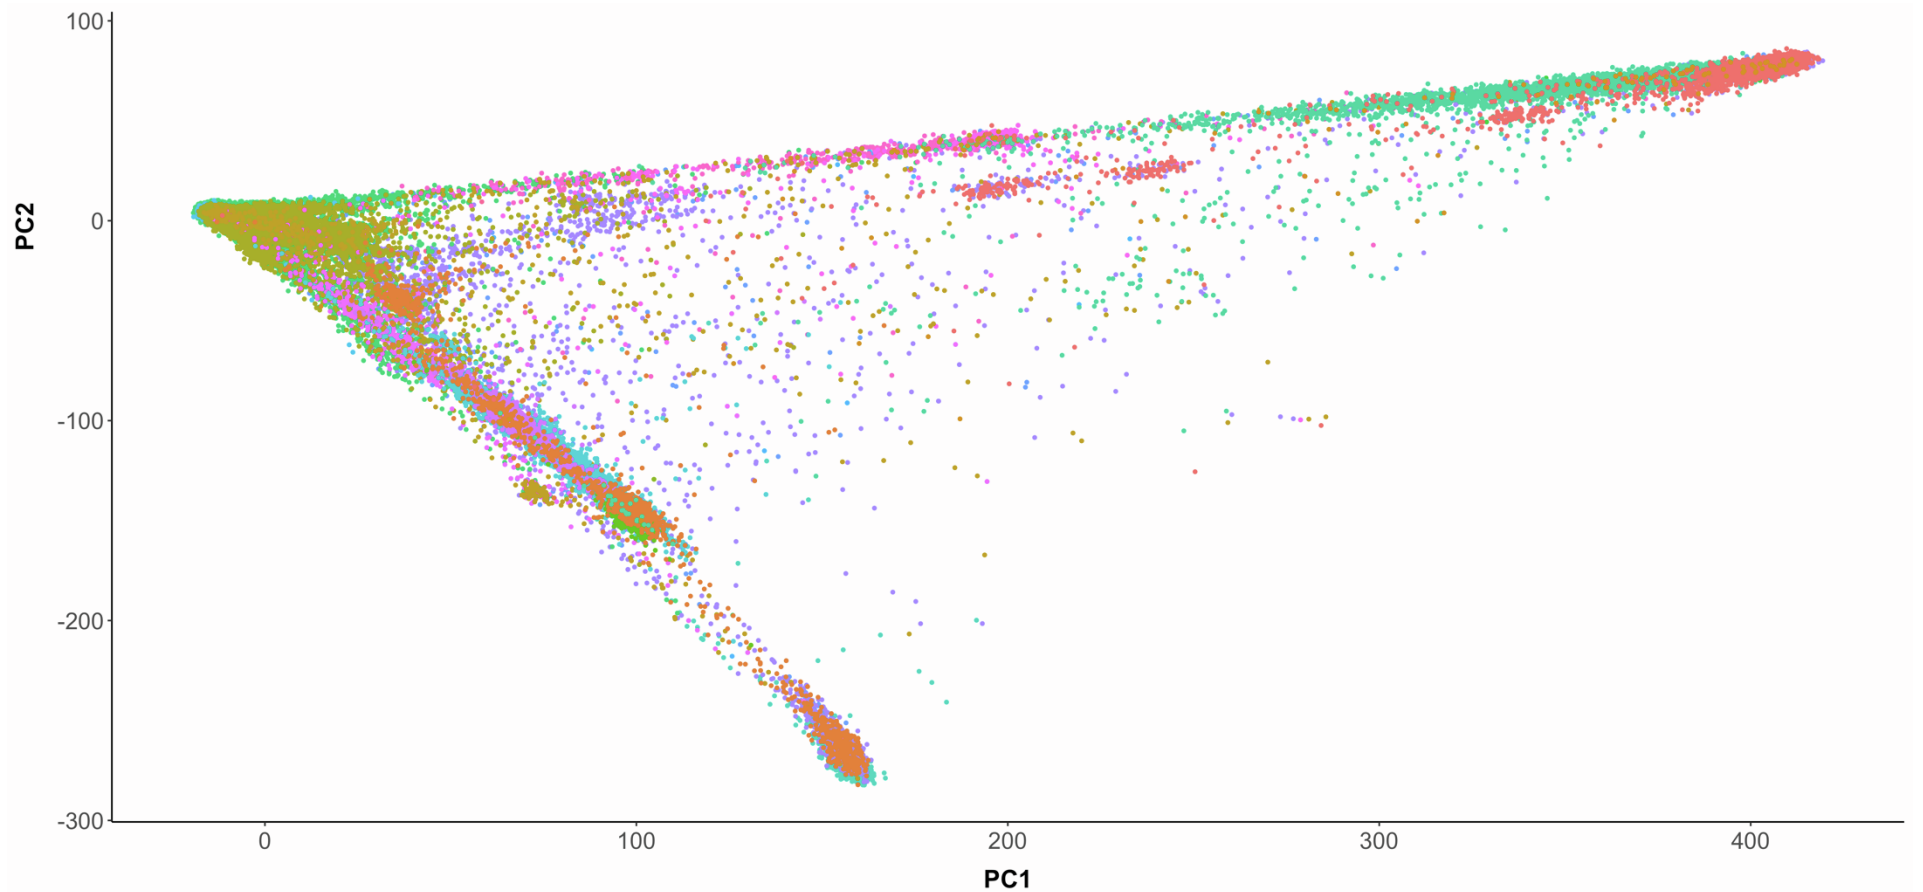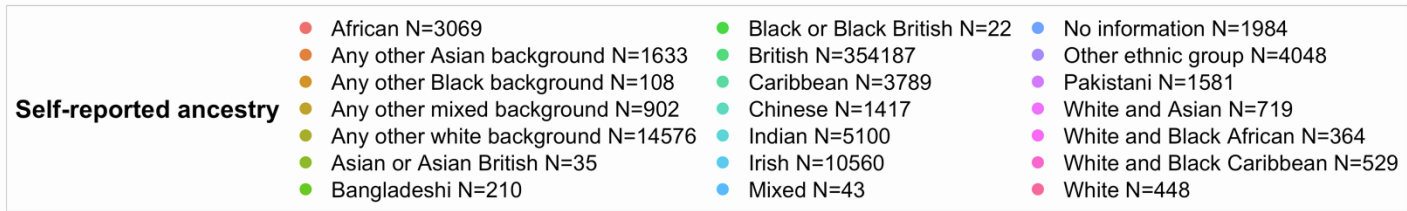

**Figure S1 | Scatterplot of the first two principal components (PC1 vs. PC2) of UKBB individuals.** The values for the second principal component (PC2) are plotted against the values for the first principal component (PC1) for the UKBB individuals evaluated in the study. Points are colored based on self-reported ancestry. Total number of individuals (N) per ancestry is reported with the plot legend.

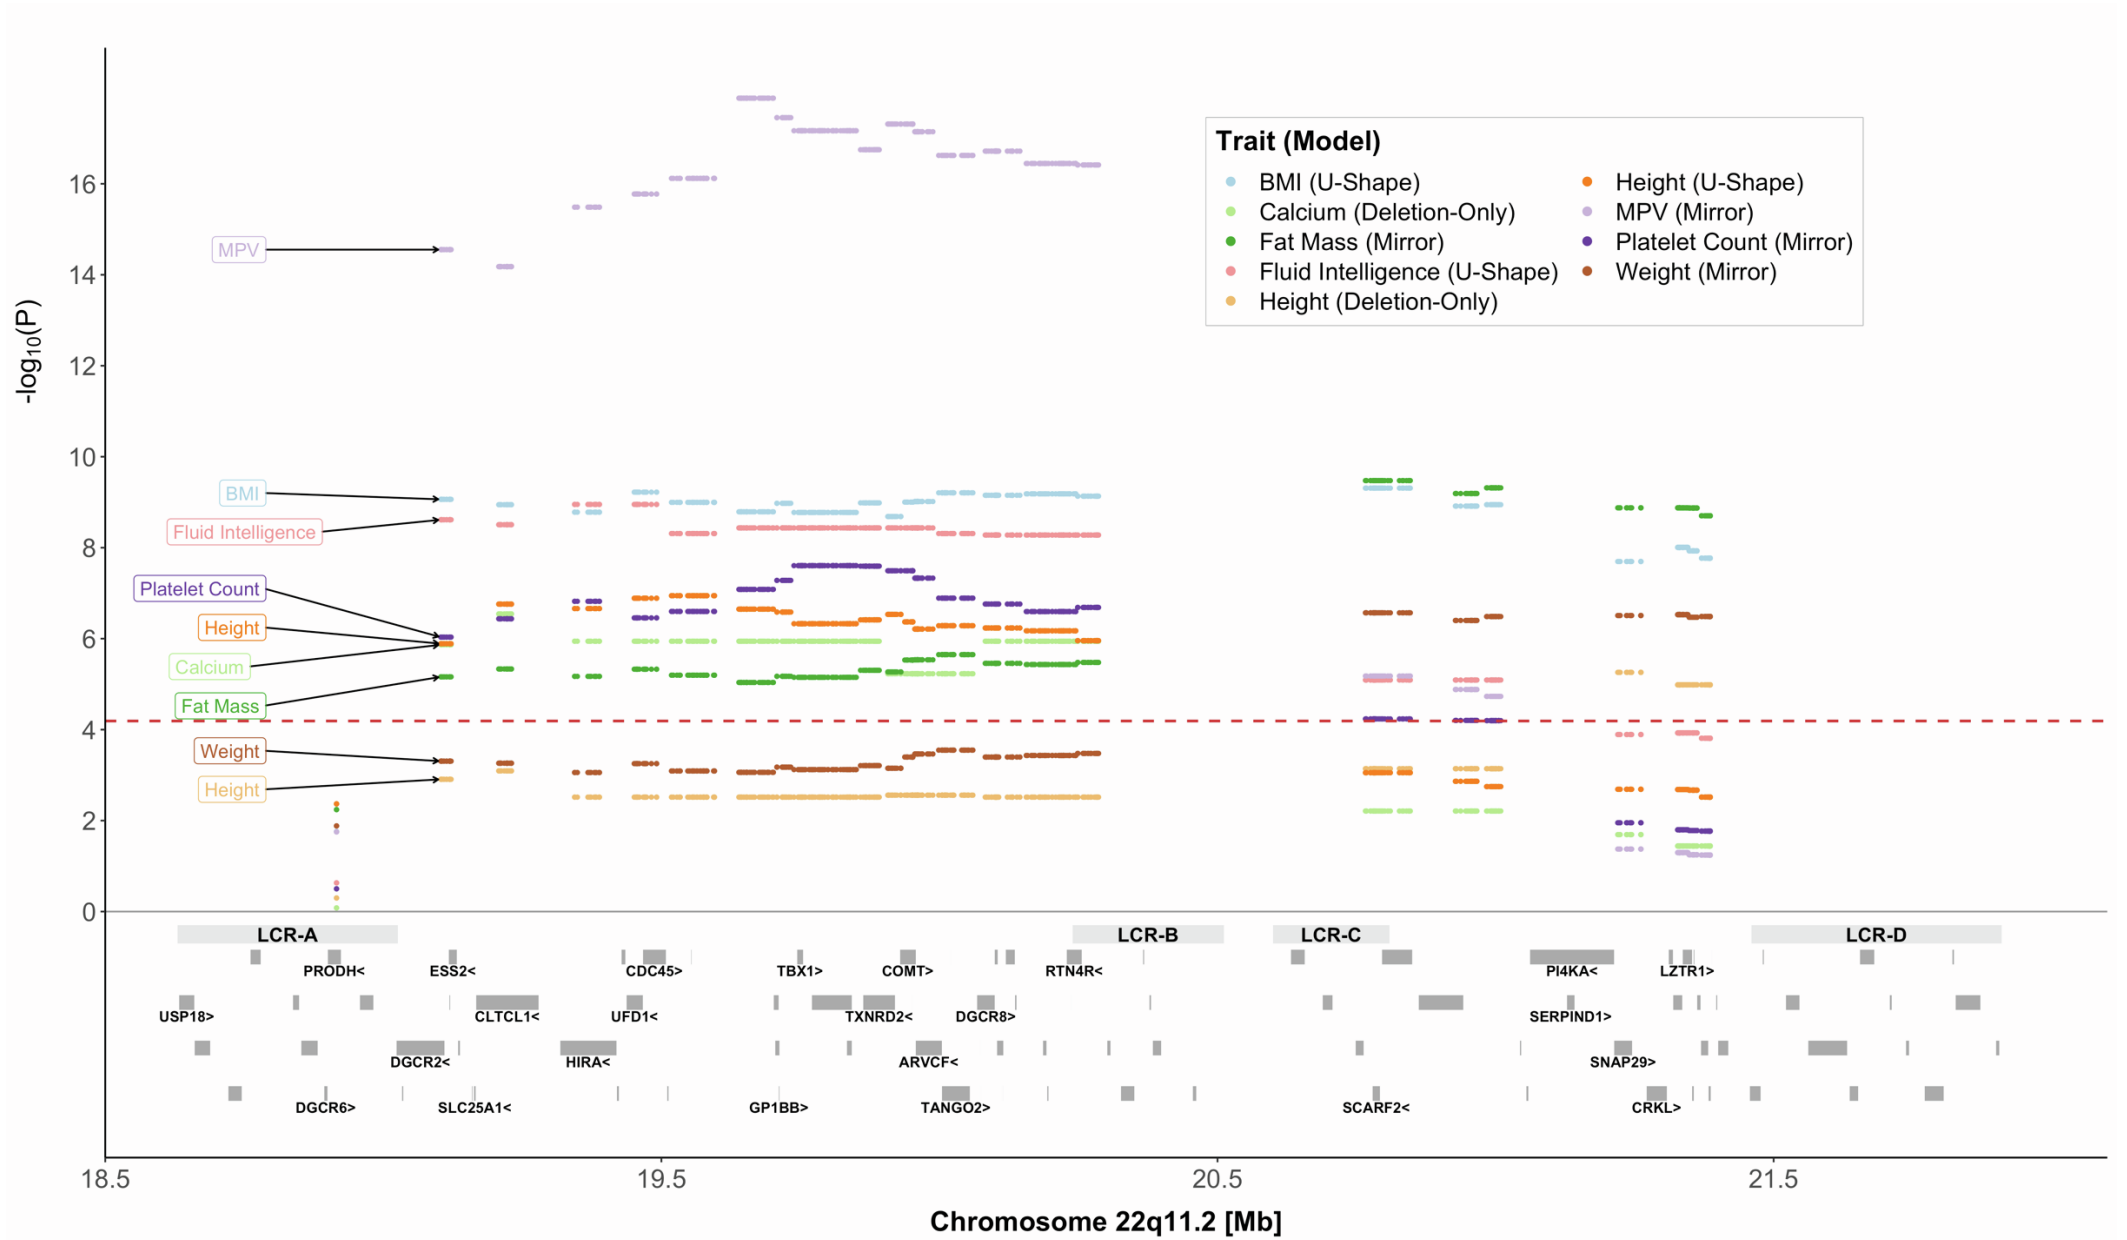

**Figure S2 | 22q11.2 CNVs and significant continuous traits. Top:** The negative logarithm of the association p-value for the CNV-trait association for the model indicated in the legend is plotted against the 22q11.2 genomic region. Each point represents a CNV proxy probe. The red dashed line indicates significance threshold ( $p < 6.5 \times 10^{-5}$ ). **Bottom:** Gray bars represent low copy-repeat region (LCR) A-D, as well as the 90 genes contained in the region. The 24 genes used for trait selection are labeled in black.

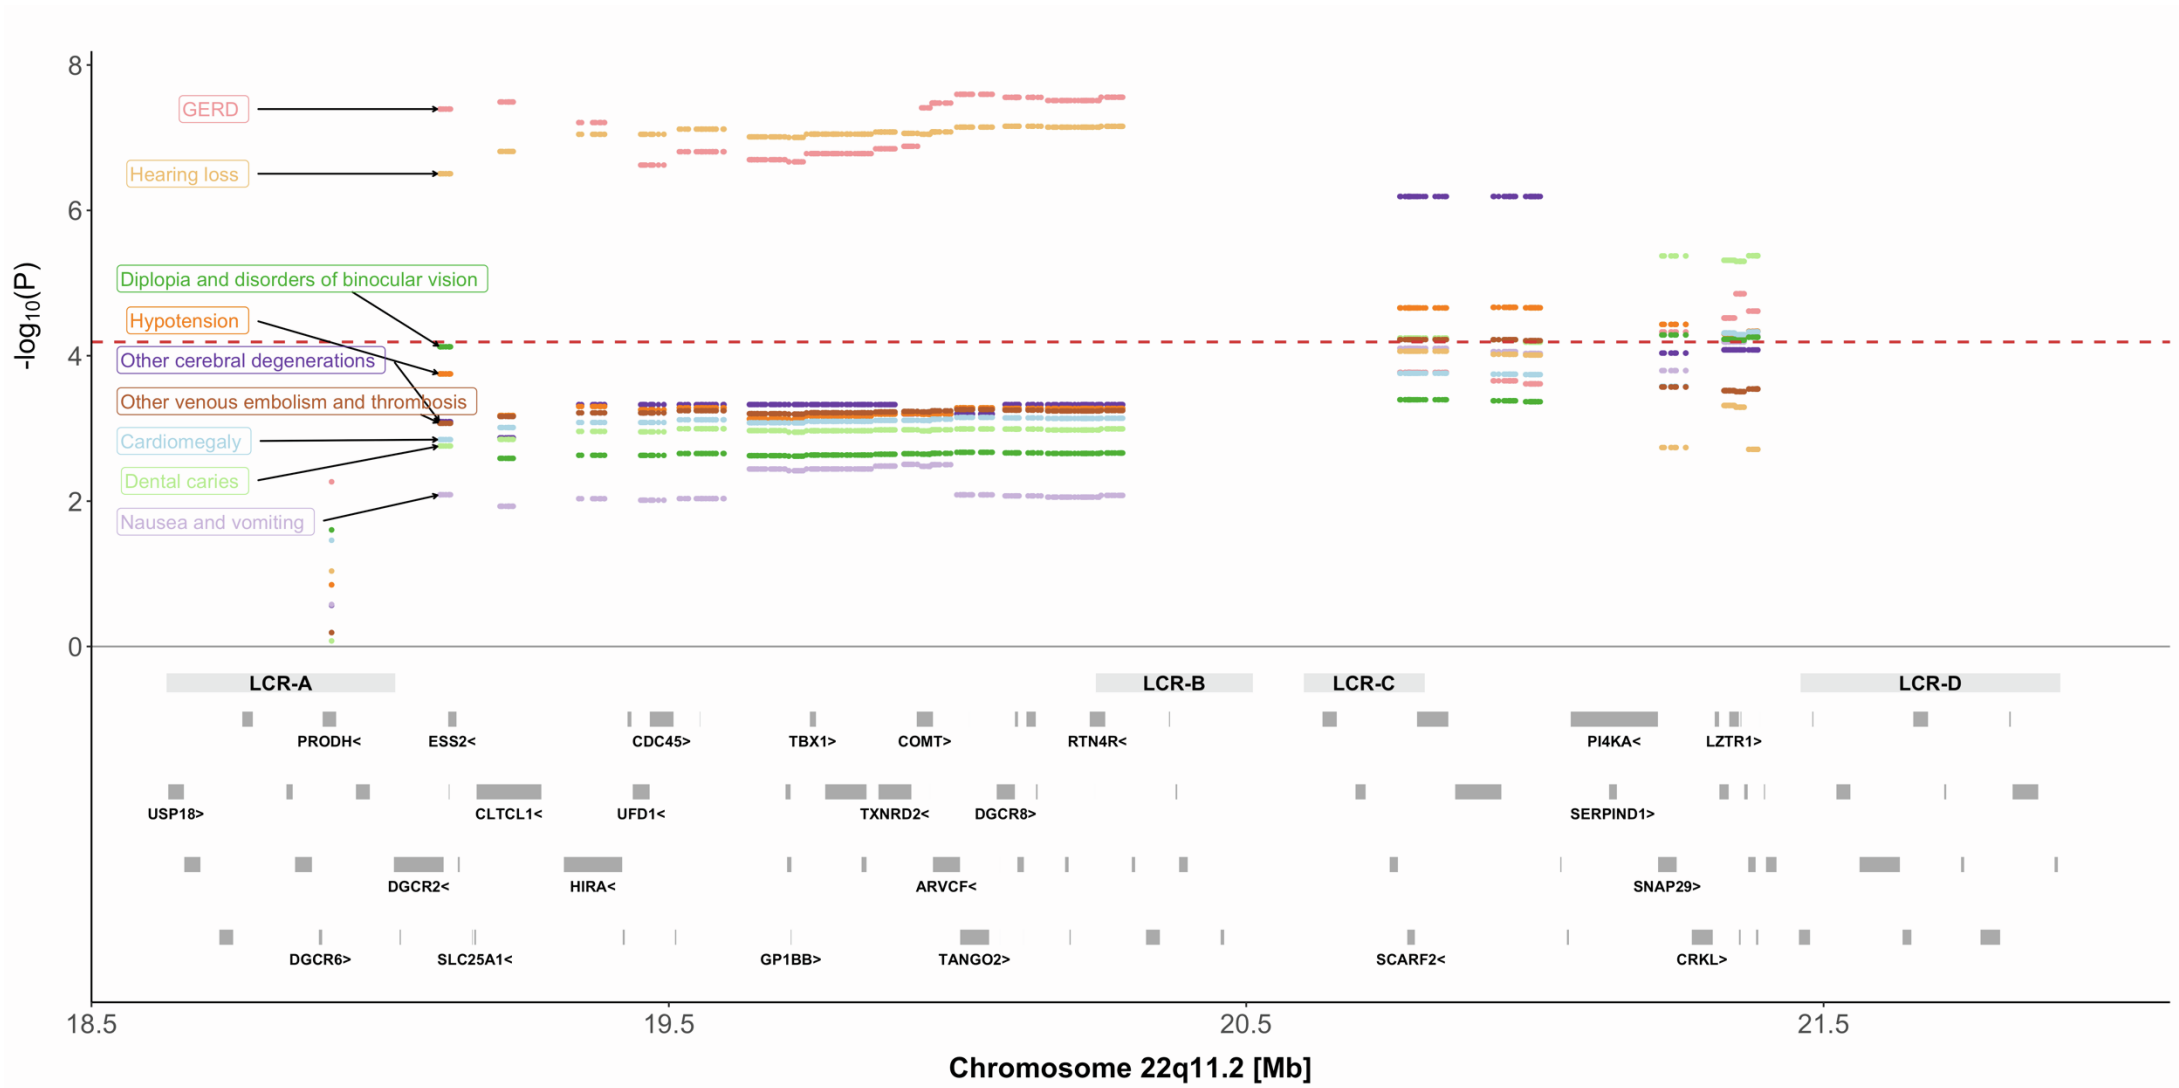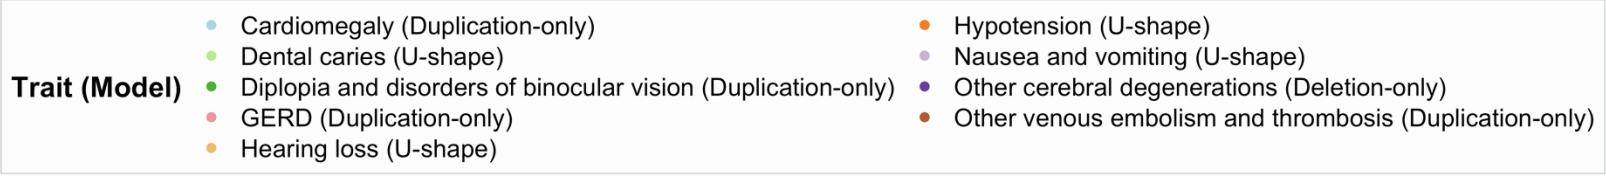

**Figure S3 | 22q11.2 CNVs and significant binary traits. Top:** The negative logarithm of the association p-value for the CNV-trait association for the model indicated in the legend is plotted against the 22q11.2 genomic region. Each point represents a CNV proxy probe. The red dashed line indicates significance threshold ( $p < 6.5 \times 10^{-5}$ ). **Bottom:** Gray bars represent low copy-repeat region (LCR) A-D, as well as the 90 genes contained in the region. The 24 genes linked to traits according to HPO are labeled in black.



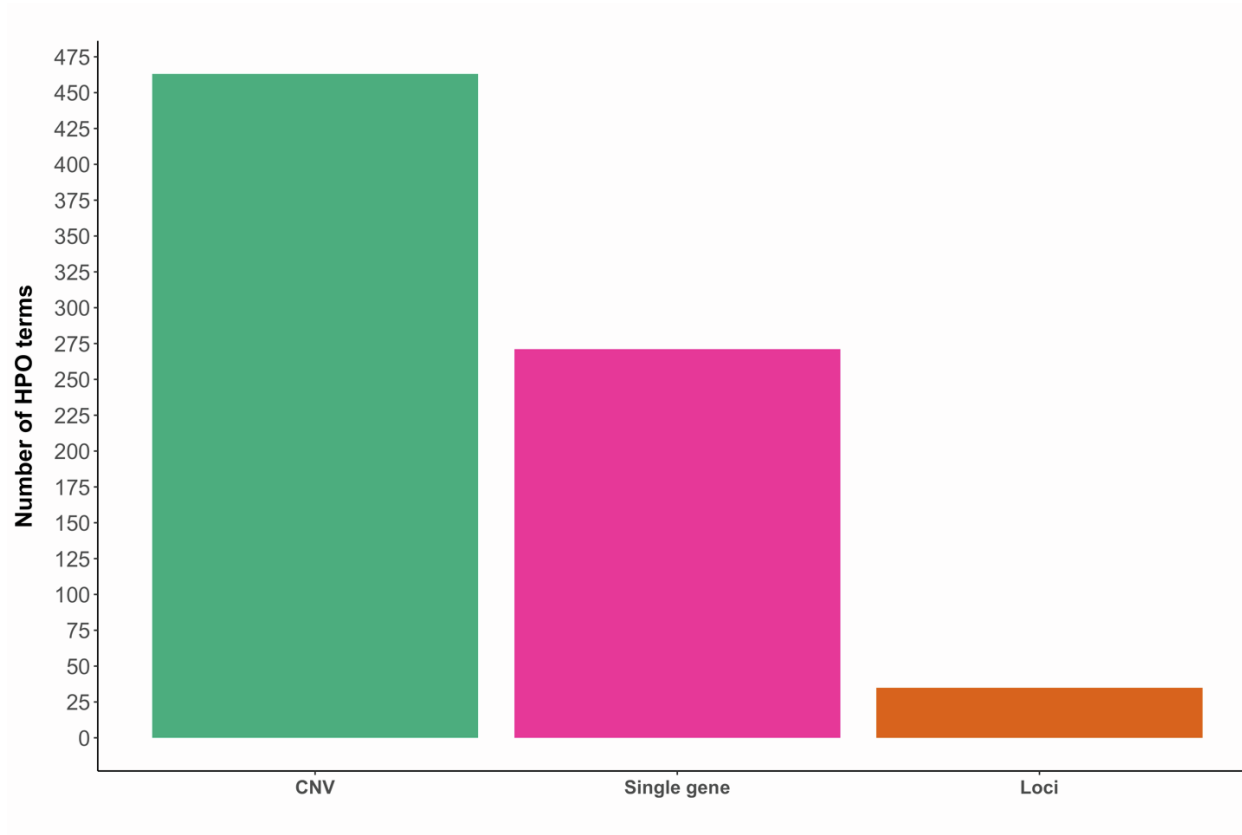

**Figure S4 | HPO terms linked to 22q11.2 genes through different genetic variants.** Barplot showing the number of HPO terms used in this study linked to conditions caused by 22q11.2 CNVs (green), genetic variants affecting a single gene in the region (pink) or linked to the 22q11.2 gene loci (orange).
